# Supplementary material
Source: PubMed Central journal article supplement (PMC2584750)
Supplement: 0809870105_ST1.pdf [file 0809870105_ST1.pdf]

Table S1. Locations of restaurants sampled

| Dates of Sampling and Address                                   |
|-----------------------------------------------------------------|
| <i>Baltimore, sampled 01/18/07</i>                              |
| <i>Wendy's</i>                                                  |
| Store A: 4410 Northern Parkway, Baltimore, MD 21215             |
| Store B: 5615 York Road, Baltimore, MD 21212                    |
| Store C: 2045 North Harford Road, Baltimore, MD 21218           |
| <i>Burger King</i>                                              |
| Store A: 555 West. 29 <sup>th</sup> Street, Baltimore, MD 21218 |
| Store B: 2301 Liberty Heights Avenue, Baltimore, MD 21215       |
| Store C: 1201 North Avenue, Baltimore, MD 21217                 |
| <i>McDonald's</i>                                               |
| Store A: 15 W. North Avenue, Baltimore, MD 21201                |
| Store B: 2001 North Broadway, Baltimore, MD 21213               |
| Store C: 2840 Greenmount Avenue, Baltimore, MD 21218            |
| <i>Boston, sampled 12/21-29/07</i>                              |
| <i>Wendy's</i>                                                  |
| Store A: 500 Park Avenue, Worcester, MA 01610                   |
| Store B: 801 West Boylston Street, Worcester, MA 01606          |
| Store C: 492 Lincoln Street, Worcester, MA 01605                |
| <i>Burger King</i>                                              |
| Store A: 163 Madison Street, Worcester, MA 01608                |
| Store B: 711 West Boylston Street, Worcester, MA 01606          |
| Store C: 53 Boston Turnpike, Shrewsbury, MA 01545               |
| <i>McDonald's</i>                                               |
| Store A: 595 Mill Street, Worcester, MA 01603                   |
| Store B: 995 Main Street, Worcester, MA 01603                   |
| Store C: 766 West Boylston Street, Worcester, MA 01606          |

*Denver, sampled 03/21/07*

*Wendy's*

Store A: 4830 Tower Road, Denver, CO 80249

Store B: 3435 N. Salida Street, Aurora, CO 80011

Store C: 4020 Chambers Road, Denver, CO 80239

*Burger King*

Store A: 3800 Chambers Road, Aurora, CO 80011

Store B: 4600 Peoria Street, Denver, CO 80239

Store C: 15290 Colfax Avenue, Aurora, CO 80011

*McDonald's*

Store A: 4475 Peoria Street, Denver, CO 80239

Store B: 14251 Colfax Avenue, Aurora, CO 80011

Store C: 3151 Airport Boulevard, Aurora, CO 80011

*Detroit, sampled 12/28-31/07*

*Wendy's*

Store A: 5445 Jackson Road, Ann Arbor, MI 48103

Store B: 1655 Plymouth Road, Ann Arbor, MI 48105

Store C: 3100 Boardwalk Street, Ann Arbor, MI 48108

*Burger King*

Store A: 151 Zeeb Rd, Ann Arbor, MI 48103

Store B: 725 Victors Way, Ann Arbor, MI 48108

Store C: 2295 Stadium Boulevard, Ann Arbor, MI 48103

*McDonald's*

Store A: 373 Zeeb Road, Ann Arbor, MI 48103

Store B: 2675 Plymouth Road, Ann Arbor, MI 48105

Store C: 2310 Stadium Boulevard, Ann Arbor, MI 48103

*Los Angeles, sampled 03/18/07*

*Wendy's*

Store A: 149 West Ventura Boulevard, Camarillo, CA 93010

Store B: 520 New L.A. Avenue, Moorpark, CA 93021

Store C: 16926 Roscoe Boulevard, Van Nuys, CA 91406

*Burger King*

Store A: 181 Arneill Road, Camarillo, CA 93010

Store B: 391 Hampshire Road, Thousand Oaks, CA 91361

Store C: 9025 Balboa Boulevard, Northridge, CA 91325

*McDonald's*

Store A: 60 Daily Drive, Camarillo, CA 93010

Store B: 501 New Los Angeles Avenue, Moorpark, CA 93021

Store C: 16908 Parthenia Street, Sepulveda, CA 91346

*San Francisco, sampled 12/26/07*

*Wendy's*

Store A: 1581 Fitzgerald Drive, Pinole, CA 94564

Store B: 12201 San Pablo Avenue, Richmond, CA 94805

Store C: 5211 Broadway, Oakland, CA 94618

*Burger King*

Store A: 4424 Broadway Avenue, Oakland, CA 94611

Store B: 1571 Fitzgerald Drive, Pinole, CA 94564

Store C: San Pablo Avenue, Richmond, CA 94806

*McDonald's*

Store A: 1402 Tara Hills Drive, Pinole, CA 94564

Store B: 1998 Shattuck Avenue, Berkeley, CA 94704

Store C: 1198 San Pablo Avenue, Berkeley, CA 94706

---
