# Supplementary material
Source: PubMed Central journal article supplement (PMC2584750)
Supplement: 0809870105_ST2.pdf [file 0809870105_ST2.pdf]

Table S2. Carbon and nitrogen stable isotope composition of all samples

| Sample*   | $\delta^{13}\text{C}$ [‰] | $\delta^{15}\text{N}$ [‰] |
|-----------|---------------------------|---------------------------|
| CAFFBKBA1 | -21.8                     | 6.2                       |
| CAFFBKBA2 | -21.8                     | 6.3                       |
| CAFFBKBA3 | -21.9                     | 6.2                       |
| CAFFBKBB1 | -21.6                     | 6.1                       |
| CAFFBKBB2 | -22.0                     | 6.2                       |
| CAFFBKBB3 | -21.8                     | 6.1                       |
| CAFFBKBC1 | -25.0                     | 6.1                       |
| CAFFBKBC2 | -24.6                     | 6.3                       |
| CAFFBKBC3 | -25.2                     | 6.3                       |
| CAFFBKCA1 | -17.5                     | 2.2                       |
| CAFFBKCA2 | -17.5                     | 2.2                       |
| CAFFBKCA3 | -17.6                     | 2.3                       |
| CAFFBKCB1 | -18.2                     | 2.2                       |
| CAFFBKCB2 | -17.0                     | 2.7                       |
| CAFFBKCB3 | -17.6                     | 2.2                       |
| CAFFBKCC1 | -17.7                     | 2.3                       |
| CAFFBKCC2 | -17.5                     | 2.5                       |
| CAFFBKCC3 | -17.8                     | 2.6                       |
| CAFFBKFA1 | -28.3                     | —†                        |
| CAFFBKFA2 | -28.1                     |                           |
| CAFFBKFA3 | -27.2                     |                           |
| CAFFBKFB1 | -28.0                     |                           |
| CAFFBKFB2 | -27.5                     |                           |
| CAFFBKFB3 | -28.4                     |                           |
| CAFFBKFC1 | -27.7                     |                           |
| CAFFBKFC2 | -27.3                     |                           |
| CAFFBKFC3 | -28.3                     |                           |
| CAFFMDBA1 | -16.6                     | 5.9                       |
| CAFFMDBA2 | -16.9                     | 6.0                       |
| CAFFMDBA3 | -17.0                     | 6.0                       |
| CAFFMDBB1 | -17.0                     | 6.0                       |
| CAFFMDBB2 | -17.6                     | 6.0                       |
| CAFFMDBB3 | -17.7                     | 5.8                       |
| CAFFMDBC1 | -16.2                     | 5.5                       |
| CAFFMDBC2 | -16.5                     | 5.7                       |
| CAFFMDBC3 | -16.4                     | 5.5                       |
| CAFFMDCA1 | -17.0                     | 2.6                       |
| CAFFMDCA2 | -17.2                     | 2.5                       |
| CAFFMDCA3 | -16.9                     | 2.4                       |
| CAFFMDCB1 | -17.7                     | 2.2                       |
| CAFFMDCB2 | -18.0                     | 2.4                       |
| CAFFMDCB3 | -17.9                     | 2.2                       |
| CAFFMDCC1 | -17.8                     | 2.3                       |
| CAFFMDCC2 | -17.9                     | 2.3                       |
| CAFFMDCC3 | -17.9                     | 2.4                       |
| CAFFMDFA1 | -26.8                     |                           |
| CAFFMDFA2 | -26.7                     |                           |
| CAFFMDFA3 | -26.6                     |                           |

---

|           |       |     |
|-----------|-------|-----|
| CAFFMDFB1 | -27.3 |     |
| CAFFMDFB2 | -27.6 |     |
| CAFFMDFB3 | -27.2 |     |
| CAFFMDFC1 | -27.2 |     |
| CAFFMDFC2 | -27.6 |     |
| CAFFMDFC3 | -26.8 |     |
| CAFFWEBA1 | -19.5 | 6.3 |
| CAFFWEBA2 | -20.0 | 6.6 |
| CAFFWEBA3 | -19.5 | 6.3 |
| CAFFWEBB1 | -14.7 | 5.8 |
| CAFFWEBB2 | -14.4 | 5.7 |
| CAFFWEBB3 | -14.8 | 5.7 |
| CAFFWEBC1 | -15.9 | 6.1 |
| CAFFWEBC2 | -15.6 | 5.9 |
| CAFFWEBC3 | -15.3 | 5.9 |
| CAFFWECA1 | -17.2 | 2.5 |
| CAFFWECA2 | -17.6 | 2.4 |
| CAFFWECA3 | -17.3 | 2.3 |
| CAFFWECB1 | -18.1 | 2.2 |
| CAFFWECB2 | -16.9 | 2.2 |
| CAFFWECB3 | -17.0 | 2.5 |
| CAFFWECC1 | -17.2 | 2.1 |
| CAFFWECC2 | -16.9 | 2.3 |
| CAFFWECC3 | -17.1 | 2.4 |
| CAFFWEFA1 | -25.9 |     |
| CAFFWEFA2 | -25.8 |     |
| CAFFWEFA3 | -26.0 |     |
| CAFFWEFB1 | -25.8 |     |
| CAFFWEFB2 | -26.5 |     |
| CAFFWEFB3 | -25.8 |     |
| CAFFWEFC1 | -24.6 |     |
| CAFFWEFC2 | -25.7 |     |
| CAFFWEFC3 | -25.1 |     |
| DEFFBKBA1 | -18.7 | 5.7 |
| DEFFBKBA2 | -18.9 | 5.6 |
| DEFFBKBA3 | -19.0 | 5.7 |
| DEFFBKBB1 | -25.4 | 6.3 |
| DEFFBKBB2 | -25.5 | 6.4 |
| DEFFBKBB3 | -25.4 | 6.3 |
| DEFFBKBC1 | -24.8 | 6.3 |
| DEFFBKBC2 | -24.0 | 6.2 |
| DEFFBKBC3 | -25.0 | 6.4 |
| DEFFBKCA1 | -17.4 | 2.2 |
| DEFFBKCA2 | -16.6 | 2.7 |
| DEFFBKCA3 | -16.8 | 2.8 |
| DEFFBKCB1 | -17.0 | 2.4 |
| DEFFBKCB2 | -17.0 | 2.8 |
| DEFFBKCB3 | -18.1 | 2.4 |
| DEFFBKCC1 | -17.7 | 2.5 |
| DEFFBKCC2 | -18.1 | 2.5 |
| DEFFBKCC3 | -17.1 | 2.7 |
| DEFFBKFA1 | -27.4 |     |

---

---

|           |       |     |
|-----------|-------|-----|
| DEFFBKFA2 | -27.4 |     |
| DEFFBKFA3 | -27.6 |     |
| DEFFBKFB1 | -28.0 |     |
| DEFFBKFB2 | -27.5 |     |
| DEFFBKFB3 | -27.9 |     |
| DEFFBKFC1 | -27.9 |     |
| DEFFBKFC2 | -27.5 |     |
| DEFFBKFC3 | -27.7 |     |
| DEFFMDBA1 | -17.4 | 6.1 |
| DEFFMDBA2 | -17.4 | 5.9 |
| DEFFMDBA3 | -17.2 | 6.0 |
| DEFFMDBB1 | -17.9 | 5.8 |
| DEFFMDBB2 | -18.0 | 5.8 |
| DEFFMDBB3 | -18.0 | 5.9 |
| DEFFMDBC1 | -18.8 | 5.7 |
| DEFFMDBC2 | -18.5 | 5.9 |
| DEFFMDBC3 | -18.6 | 5.5 |
| DEFFMDCA1 | -17.0 | 2.7 |
| DEFFMDCA2 | -17.1 | 2.8 |
| DEFFMDCA3 | -18.1 | 2.6 |
| DEFFMDCB1 | -17.7 | 2.3 |
| DEFFMDCB2 | -17.8 | 2.3 |
| DEFFMDCB3 | -17.2 | 2.5 |
| DEFFMDCC1 | -17.2 | 2.4 |
| DEFFMDCC2 | -18.1 | 2.1 |
| DEFFMDCC3 | -17.7 | 2.1 |
| DEFFMDFA1 | -26.1 |     |
| DEFFMDFA2 | -26.8 |     |
| DEFFMDFA3 | -26.1 |     |
| DEFFMDFB1 | -27.0 |     |
| DEFFMDFB2 | -26.5 |     |
| DEFFMDFB3 | -27.3 |     |
| DEFFMDFC1 | -27.5 |     |
| DEFFMDFC2 | -27.1 |     |
| DEFFMDFC3 | -26.6 |     |
| DEFFWEBA1 | -13.8 | 5.9 |
| DEFFWEBA2 | -14.0 | 6.0 |
| DEFFWEBA3 | -14.1 | 5.7 |
| DEFFWEBB1 | -14.3 | 5.8 |
| DEFFWEBB2 | -14.6 | 5.7 |
| DEFFWEBB3 | -14.3 | 5.7 |
| DEFFWEBC1 | -14.4 | 5.8 |
| DEFFWEBC2 | -14.3 | 5.9 |
| DEFFWEBC3 | -14.3 | 5.9 |
| DEFFWECA1 | -17.0 | 2.1 |
| DEFFWECA2 | -17.3 | 2.0 |
| DEFFWECA3 | -16.9 | 2.4 |
| DEFFWECB1 | -18.1 | 2.1 |
| DEFFWECB2 | -17.0 | 2.4 |
| DEFFWECB3 | -17.1 | 2.4 |
| DEFFWECC1 | -17.0 | 2.2 |
| DEFFWECC2 | -17.2 | 2.1 |

---

---

|           |       |     |
|-----------|-------|-----|
| DEFFWECC3 | -17.2 | 2.3 |
| DEFFWEFA1 | -24.5 |     |
| DEFFWEFA2 | -24.4 |     |
| DEFFWEFA3 | -24.4 |     |
| DEFFWEFB1 | -25.1 |     |
| DEFFWEFB2 | -24.1 |     |
| DEFFWEFB3 | -23.9 |     |
| DEFFWEFC1 | -24.7 |     |
| DEFFWEFC2 | -25.2 |     |
| MAFFBKBA1 | -17.9 | 7.4 |
| MAFFBKBA2 | -18.6 | 7.3 |
| MAFFBKBA3 | -17.9 | 7.4 |
| MAFFBKBB1 | -18.7 | 7.1 |
| MAFFBKBB2 | -18.7 | 6.9 |
| MAFFBKBB3 | -19.0 | 6.9 |
| MAFFBKBC1 | -20.0 | 7.2 |
| MAFFBKBC2 | -20.2 | 7.2 |
| MAFFBKBC3 | -20.1 | 7.2 |
| MAFFBKCA1 | -17.1 | 2.7 |
| MAFFBKCA2 | -17.4 | 2.5 |
| MAFFBKCA3 | -17.5 | 2.5 |
| MAFFBKCB1 | -16.9 | 2.7 |
| MAFFBKCB2 | -17.2 | 2.6 |
| MAFFBKCB3 | -17.3 | 2.6 |
| MAFFBKCC1 | -17.3 | 2.8 |
| MAFFBKCC2 | -17.0 | 2.6 |
| MAFFBKCC3 | -16.8 | 2.8 |
| MAFFBKFA1 | -27.9 |     |
| MAFFBKFA2 | -28.4 |     |
| MAFFBKFA3 | -28.2 |     |
| MAFFBKFB1 | -28.4 |     |
| MAFFBKFB2 | -28.4 |     |
| MAFFBKFB3 | -28.8 |     |
| MAFFBKFC1 | -28.1 |     |
| MAFFBKFC2 | -28.1 |     |
| MAFFBKFC3 | -28.5 |     |
| MAFFMDBA1 | -17.9 | 6.3 |
| MAFFMDBA2 | -17.9 | 6.3 |
| MAFFMDBA3 | -18.0 | 6.4 |
| MAFFMDBB1 | -15.4 | 6.4 |
| MAFFMDBB2 | -15.1 | 6.3 |
| MAFFMDBB3 | -15.2 | 6.1 |
| MAFFMDBC1 | -15.4 | 6.0 |
| MAFFMDBC2 | -15.2 | 6.2 |
| MAFFMDBC3 | -15.4 | 6.2 |
| MAFFMDCA1 | -17.2 | 2.7 |
| MAFFMDCA2 | -17.7 | 1.5 |
| MAFFMDCA3 | -17.5 | 1.7 |
| MAFFMDCB1 | -17.2 | 2.5 |
| MAFFMDCB2 | -17.9 | 1.8 |
| MAFFMDCB3 | -18.0 | 1.8 |
| MAFFMDCC1 | -17.5 | 2.5 |

---

---

|           |       |     |
|-----------|-------|-----|
| MAFFMDCC2 | -18.5 | 1.7 |
| MAFFMDCC3 | -17.5 | 2.3 |
| MAFFMDFA1 | -27.5 |     |
| MAFFMDFA2 | -27.4 |     |
| MAFFMDFA3 | -27.1 |     |
| MAFFMDFB1 | -27.5 |     |
| MAFFMDFB2 | -27.6 |     |
| MAFFMDFB3 | -27.5 |     |
| MAFFMDFC1 | -27.5 |     |
| MAFFMDFC2 | -27.8 |     |
| MAFFMDFC3 | -27.5 |     |
| MAFFWEBA1 | -15.0 | 6.2 |
| MAFFWEBA2 | -14.7 | 6.3 |
| MAFFWEBA3 | -14.6 | 6.1 |
| MAFFWEBB1 | -16.0 | 6.3 |
| MAFFWEBB2 | -13.7 | 6.4 |
| MAFFWEBB3 | -15.5 | 6.2 |
| MAFFWEBC1 | -15.1 | 6.5 |
| MAFFWEBC2 | -15.4 | 6.5 |
| MAFFWEBC3 | -15.1 | 6.5 |
| MAFFWECA1 | -17.4 | 2.5 |
| MAFFWECA2 | -17.1 | 2.5 |
| MAFFWECA3 | -17.4 | 2.4 |
| MAFFWECB1 | -17.3 | 2.5 |
| MAFFWECB2 | -17.0 | 2.5 |
| MAFFWECB3 | -17.5 | 2.5 |
| MAFFWECC1 | -17.0 | 2.4 |
| MAFFWECC2 | -16.9 | 2.6 |
| MAFFWECC3 | -17.5 | 2.4 |
| MAFFWEFA1 | -26.0 |     |
| MAFFWEFA2 | -26.0 |     |
| MAFFWEFA3 | -25.6 |     |
| MAFFWEFB1 | -25.0 |     |
| MAFFWEFB2 | -25.4 |     |
| MAFFWEFB3 | -25.6 |     |
| MAFFWEFC1 | -25.5 |     |
| MAFFWEFC2 | -24.9 |     |
| MAFFWEFC3 | -25.0 |     |
| MDFFBKBA1 | -20.6 | 6.5 |
| MDFFBKBA2 | -20.6 | 6.5 |
| MDFFBKBA3 | -20.8 | 6.6 |
| MDFFBKBB1 | -20.7 | 6.1 |
| MDFFBKBB2 | -20.7 | 6.3 |
| MDFFBKBB3 | -20.6 | 6.1 |
| MDFFBKBC1 | -19.5 | 6.1 |
| MDFFBKBC2 | -19.8 | 6.1 |
| MDFFBKBC3 | -19.6 | 6.2 |
| MDFFBKCA1 | -17.8 | 2.4 |
| MDFFBKCA2 | -17.6 | 1.9 |
| MDFFBKCA3 | -17.5 | 2.5 |
| MDFFBKCB1 | -18.5 | 1.9 |
| MDFFBKCB2 | -19.3 | 2.1 |

---

---

|           |       |     |
|-----------|-------|-----|
| MDFFBKCB3 | -17.4 | 2.2 |
| MDFFBKCC1 | -17.4 | 2.4 |
| MDFFBKCC2 | -16.7 | 2.8 |
| MDFFBKCC3 | -17.3 | 2.6 |
| MDFFBKFA1 | -27.8 |     |
| MDFFBKFA2 | -27.9 |     |
| MDFFBKFA3 | -27.9 |     |
| MDFFBKFB1 | -27.7 |     |
| MDFFBKFB2 | -27.5 |     |
| MDFFBKFB3 | -28.2 |     |
| MDFFBKFC1 | -28.1 |     |
| MDFFBKFC2 | -27.8 |     |
| MDFFBKFC3 | -27.3 |     |
| MDFFMDBA1 | -17.2 | 5.5 |
| MDFFMDBA2 | -16.9 | 5.3 |
| MDFFMDBA3 | -17.0 | 5.5 |
| MDFFMDBB1 | -16.6 | 6.1 |
| MDFFMDBB2 | -16.9 | 6.1 |
| MDFFMDBB3 | -17.0 | 6.2 |
| MDFFMDBC1 | -17.6 | 5.9 |
| MDFFMDBC2 | -17.7 | 5.9 |
| MDFFMDBC3 | -17.7 | 6.1 |
| MDFFMDCA1 | -19.1 | 1.9 |
| MDFFMDCA2 | -18.0 | 1.7 |
| MDFFMDCA3 | -18.0 | 1.9 |
| MDFFMDCB1 | -18.0 | 1.8 |
| MDFFMDCB2 | -18.0 | 1.9 |
| MDFFMDCB3 | -18.3 | 1.8 |
| MDFFMDC1  | -17.7 | 1.6 |
| MDFFMDC2  | -18.1 | 1.8 |
| MDFFMDC3  | -18.2 | 2.0 |
| MDFFMDF1  | -28.5 |     |
| MDFFMDF2  | -27.5 |     |
| MDFFMDF3  | -28.4 |     |
| MDFFMDFB1 | -27.7 |     |
| MDFFMDFB2 | -28.0 |     |
| MDFFMDFB3 | -27.2 |     |
| MDFFMDFC1 | -27.5 |     |
| MDFFMDFC2 | -28.4 |     |
| MDFFMDFC3 | -28.3 |     |
| MDFFW1    | -14.4 | 5.8 |
| MDFFW2    | -14.5 | 5.9 |
| MDFFW3    | -16.9 | 5.9 |
| MDFFWBB1  | -17.0 | 6.1 |
| MDFFWBB2  | -16.6 | 6.3 |
| MDFFWBB3  | -16.9 | 6.2 |
| MDFFWBC1  | -17.0 | 6.3 |
| MDFFWBC2  | -16.9 | 6.1 |
| MDFFWBC3  | -17.0 | 6.3 |
| MDFW1     | -17.6 | 2.3 |
| MDFW2     | -17.6 | 2.2 |
| MDFW3     | -17.5 | 2.2 |

---

---

|           |       |     |
|-----------|-------|-----|
| MDFFWECB1 | -17.6 | 2.3 |
| MDFFWECB2 | -17.1 | 2.4 |
| MDFFWECB3 | -17.5 | 2.5 |
| MDFFWECC1 | -18.7 | 2.3 |
| MDFFWECC2 | -18.0 | 2.0 |
| MDFFWECC3 | -17.6 | 2.0 |
| MDFFWEFA1 | -26.2 |     |
| MDFFWEFA2 | -26.5 |     |
| MDFFWEFA3 | -26.6 |     |
| MDFFWEFB1 | -26.5 |     |
| MDFFWEFB2 | -25.0 |     |
| MDFFWEFB3 | -25.2 |     |
| MDFFWEFC1 | -27.7 |     |
| MDFFWEFC2 | -27.5 |     |
| MDFFWEFC3 | -27.3 |     |
| MIFFBKBA1 | -18.3 | 5.8 |
| MIFFBKBA2 | -18.4 | 5.8 |
| MIFFBKBA3 | -18.2 | 5.8 |
| MIFFBKBB1 | -17.1 | 6.6 |
| MIFFBKBB2 | -17.1 | 6.6 |
| MIFFBKBB3 | -17.1 | 6.7 |
| MIFFBKBC1 | -18.4 | 6.0 |
| MIFFBKBC2 | -18.4 | 6.0 |
| MIFFBKBC3 | -18.5 | 6.0 |
| MIFFBKCA1 | -17.1 | 2.6 |
| MIFFBKCA2 | -17.1 | 2.7 |
| MIFFBKCA3 | -17.0 | 2.8 |
| MIFFBKCB1 | -17.6 | 2.1 |
| MIFFBKCB2 | -17.8 | 2.3 |
| MIFFBKCB3 | -17.5 | 2.3 |
| MIFFBKCC1 | -17.3 | 2.5 |
| MIFFBKCC3 | -17.7 | 2.3 |
| MIFFBKFA1 | -28.2 |     |
| MIFFBKFA2 | -28.4 |     |
| MIFFBKFA3 | -28.8 |     |
| MIFFBKFB1 | -28.6 |     |
| MIFFBKFB2 | -28.6 |     |
| MIFFBKFB3 | -28.1 |     |
| MIFFBKFC1 | -28.7 |     |
| MIFFBKFC2 | -28.6 |     |
| MIFFBKFC3 | -28.1 |     |
| MIFFMDBA1 | -14.9 | 6.2 |
| MIFFMDBA2 | -14.9 | 6.3 |
| MIFFMDBA3 | -14.8 | 6.1 |
| MIFFMDBB1 | -17.6 | 5.5 |
| MIFFMDBB2 | -18.0 | 5.4 |
| MIFFMDBB3 | -17.9 | 5.5 |
| MIFFMDBC1 | -20.2 | 6.4 |
| MIFFMDBC2 | -20.3 | 6.4 |
| MIFFMDBC3 | -20.0 | 6.5 |
| MIFFMDCA1 | -17.5 | 2.1 |
| MIFFMDCA2 | -17.7 | 1.8 |

---

---

|           |       |     |
|-----------|-------|-----|
| MIFFMDCA3 | -17.1 | 2.5 |
| MIFFMDCB1 | -17.8 | 2.1 |
| MIFFMDCB2 | -17.5 | 1.7 |
| MIFFMDCB3 | -17.7 | 1.6 |
| MIFFMDCC1 | -17.9 | 2.2 |
| MIFFMDCC2 | -17.9 | 1.8 |
| MIFFMDCC3 | -17.8 | 2.0 |
| MIFFMDFA1 | -27.8 |     |
| MIFFMDFA2 | -27.7 |     |
| MIFFMDFA3 | -27.8 |     |
| MIFFMDFB1 | -27.3 |     |
| MIFFMDFB2 | -27.6 |     |
| MIFFMDFB3 | -27.3 |     |
| MIFFMDFC1 | -27.7 |     |
| MIFFMDFC2 | -27.3 |     |
| MIFFMDFC3 | -28.4 |     |
| MIFFWEBA1 | -14.6 | 5.7 |
| MIFFWEBA2 | -14.6 | 5.6 |
| MIFFWEBA3 | -14.7 | 5.7 |
| MIFFWEBB1 | -14.6 | 5.8 |
| MIFFWEBB2 | -14.6 | 6.0 |
| MIFFWEBB3 | -14.8 | 6.1 |
| MIFFWEBC1 | -17.5 | 6.0 |
| MIFFWEBC2 | -16.9 | 6.0 |
| MIFFWEBC3 | -16.7 | 6.1 |
| MIFFWECA1 | -17.3 | 2.2 |
| MIFFWECA2 | -17.3 | 2.6 |
| MIFFWECA3 | -17.2 | 2.3 |
| MIFFWECB1 | -17.0 | 2.3 |
| MIFFWECB2 | -17.3 | 2.4 |
| MIFFWECB3 | -17.0 | 2.3 |
| MIFFWECC1 | -17.3 | 2.3 |
| MIFFWECC2 | -17.4 | 2.4 |
| MIFFWECC3 | -17.2 | 2.6 |
| MIFFWEFA1 | -26.5 |     |
| MIFFWEFA2 | -25.4 |     |
| MIFFWEFA3 | -26.5 |     |
| MIFFWEFB1 | -27.0 |     |
| MIFFWEFB2 | -26.6 |     |
| MIFFWEFB3 | -26.7 |     |
| MIFFWEFC1 | -25.0 |     |
| MIFFWEFC2 | -26.1 |     |
| MIFFWEFC3 | -26.2 |     |
| SFFFBKBA1 | -21.5 | 6.6 |
| SFFFBKBA2 | -21.8 | 6.4 |
| SFFFBKBA3 | -21.7 | 6.8 |
| SFFFBKBB1 | -23.3 | 6.4 |
| SFFFBKBB2 | -23.6 | 6.5 |
| SFFFBKBB3 | -23.4 | 6.5 |
| SFFFBKBC1 | -22.0 | 6.8 |
| SFFFBKBC2 | -21.5 | 6.6 |
| SFFFBKBC3 | -21.9 | 6.4 |

---



---

|            |       |     |
|------------|-------|-----|
| SFFFBKCA1  | -17.5 | 2.5 |
| SFFFBKCA2  | -17.1 | 2.4 |
| SFFFBKCA3  | -17.4 | 2.4 |
| SFFFBKCB1  | -17.1 | 2.3 |
| SFFFBKCB2  | -16.8 | 2.2 |
| SFFFBKCB3  | -16.9 | 2.2 |
| SFFFBKCC1  | -16.6 | 2.8 |
| SFFFBKCC2  | -16.7 | 2.8 |
| SFFFBKCC3  | -16.8 | 2.7 |
| SFFFBKFA1  | -27.5 |     |
| SFFFBKFA2  | -27.7 |     |
| SFFFBKFA3  | -27.7 |     |
| SFFFBKFB1  | -27.9 |     |
| SFFFBKFB2  | -27.0 |     |
| SFFFBKFB3  | -28.1 |     |
| SFFFBKFC1  | -27.7 |     |
| SFFFBKFC2  | -27.8 |     |
| SFFFBKFC3  | -27.9 |     |
| SFFFMDBA1  | -21.3 | 6.5 |
| SFFFMDBA2  | -21.5 | 6.1 |
| SFFFMDBA3  | -21.7 | 5.8 |
| SFFFMDBB1  | -19.4 | 6.0 |
| SFFFMDBB2  | -19.8 | 5.9 |
| SFFFMDBB3  | -19.6 | 5.9 |
| SFFFMDBC1  | -19.9 | 6.1 |
| SFFFMDBC2  | -20.3 | 6.3 |
| SFFFMDBC3  | -19.9 | 5.9 |
| SFFFMDC A1 | -17.6 | 2.7 |
| SFFFMDC A2 | -17.6 | 2.7 |
| SFFFMDC A3 | -17.6 | 2.6 |
| SFFFMDCB1  | -17.5 | 2.4 |
| SFFFMDCB2  | -17.5 | 2.4 |
| SFFFMDCB3  | -17.3 | 2.4 |
| SFFFMDC C1 | -17.4 | 2.5 |
| SFFFMDC C2 | -17.5 | 2.6 |
| SFFFMDC C3 | -17.4 | 2.6 |
| SFFFMDF A1 | -26.4 |     |
| SFFFMDF A2 | -26.6 |     |
| SFFFMDF A3 | -26.5 |     |
| SFFFMDF B1 | -26.3 |     |
| SFFFMDF B2 | -26.7 |     |
| SFFFMDF B3 | -26.6 |     |
| SFFFMDF C1 | -26.4 |     |
| SFFFMDF C2 | -26.8 |     |
| SFFFMDF C3 | -26.7 |     |
| SFFFW EBA1 | -15.0 | 5.8 |
| SFFFW EBA2 | -15.6 | 5.7 |
| SFFFW EBA3 | -14.8 | 5.7 |
| SFFFW EBB1 | -15.5 | 6.0 |
| SFFFW EBB2 | -15.6 | 6.0 |
| SFFFW EBB3 | -15.4 | 6.0 |
| SFFFW EBC1 | -15.1 | 5.8 |

---

|           |       |     |
|-----------|-------|-----|
| SFFFWEBC2 | -15.1 | 5.8 |
| SFFFWEBC3 | -15.2 | 5.8 |
| SFFFWECA1 | -17.7 | 2.0 |
| SFFFWECA2 | -17.7 | 2.0 |
| SFFFWECA3 | -17.6 | 1.9 |
| SFFFWECA1 | -17.0 | 2.2 |
| SFFFWECA2 | -16.8 | 2.1 |
| SFFFWECA3 | -17.0 | 2.3 |
| SFFFWECC1 | -17.3 | 2.0 |
| SFFFWECC2 | -17.2 | 2.0 |
| SFFFWECC3 | -17.4 | 2.0 |
| SFFFWEFA1 | -24.2 |     |
| SFFFWEFA2 | -24.4 |     |
| SFFFWEFA3 | -23.9 |     |
| SFFFWEFB1 | -24.7 |     |
| SFFFWEFB2 | -24.9 |     |
| SFFFWEFB3 | -25.0 |     |
| SFFFWEFC1 | -25.4 |     |
| SFFFWEFC2 | -25.2 |     |
| SFFFWEFC3 | -25.1 |     |

\* City code: CA = Los Angeles, DE = Denver, MA = Boston, MD = Baltimore, MI = Detroit, SF = San Francisco; FF designates “Fast Food”; restaurant code: WE = Wendy’s, BK = Burger King, MD = McDonald’s; food type: C = chicken, B = beef, F = fries; store location: A, B, C (*see Table 1 within main text*); serving: 1, 2, 3. Example: CAFFWECA1 (Los Angeles Fast Food from Wendy’s, chicken from store A, serving number 1).

† The amount of nitrogen in fries was less than 1% (by mass); therefore  $\delta^{15}\text{N}$  value could not be reliably determined.
